# Supplementary material
Source: publisher site journal article supplement (https://www.dovepress.com/article/287084)
Supplement: Supplementary file 1 [file get_supplementary_file.php]

**Figure S1.** mRNA-miRNA-lncRNA competing endogenous RNA (ceRNA) network of under-expressed (a) and overexpressed (b) miRNAs. In network a red circles = up-regulated mRNAs, pink rectangle = up-regulated lncRNAs, bule diamonds = down-regulated miRNAs. In network b blue circles = down-regulated mRNAs, green rectangle = down-regulated lncRNAs, and red diamonds = up-regulated miRNAs.

**
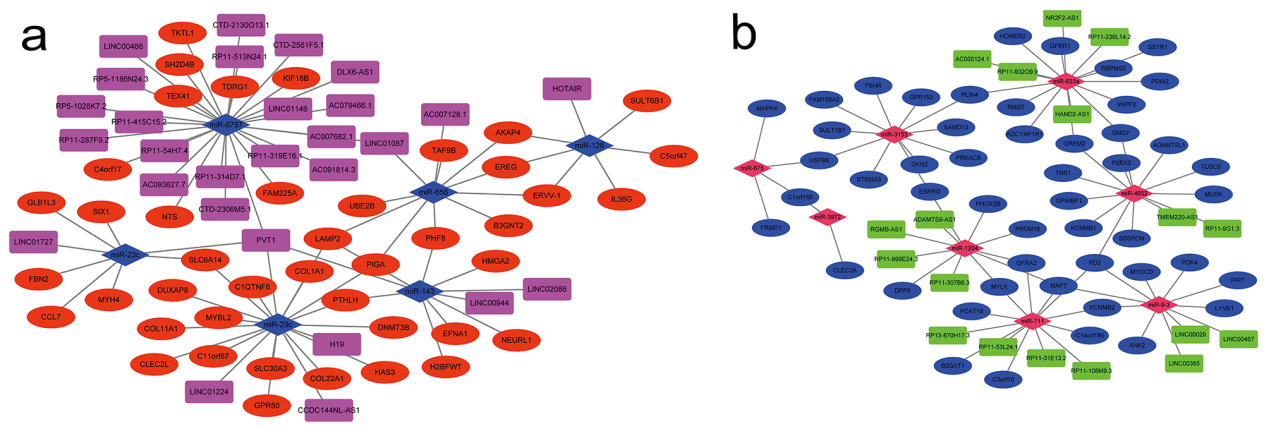
**

**Figure S2.** Function analysis of the intersection DEmRNAs. a. Genes were assigned to GO categories and the terms were summarized into three main GO categories. b. KEGG classification and pathway enrichment of DEmRNAs.

**
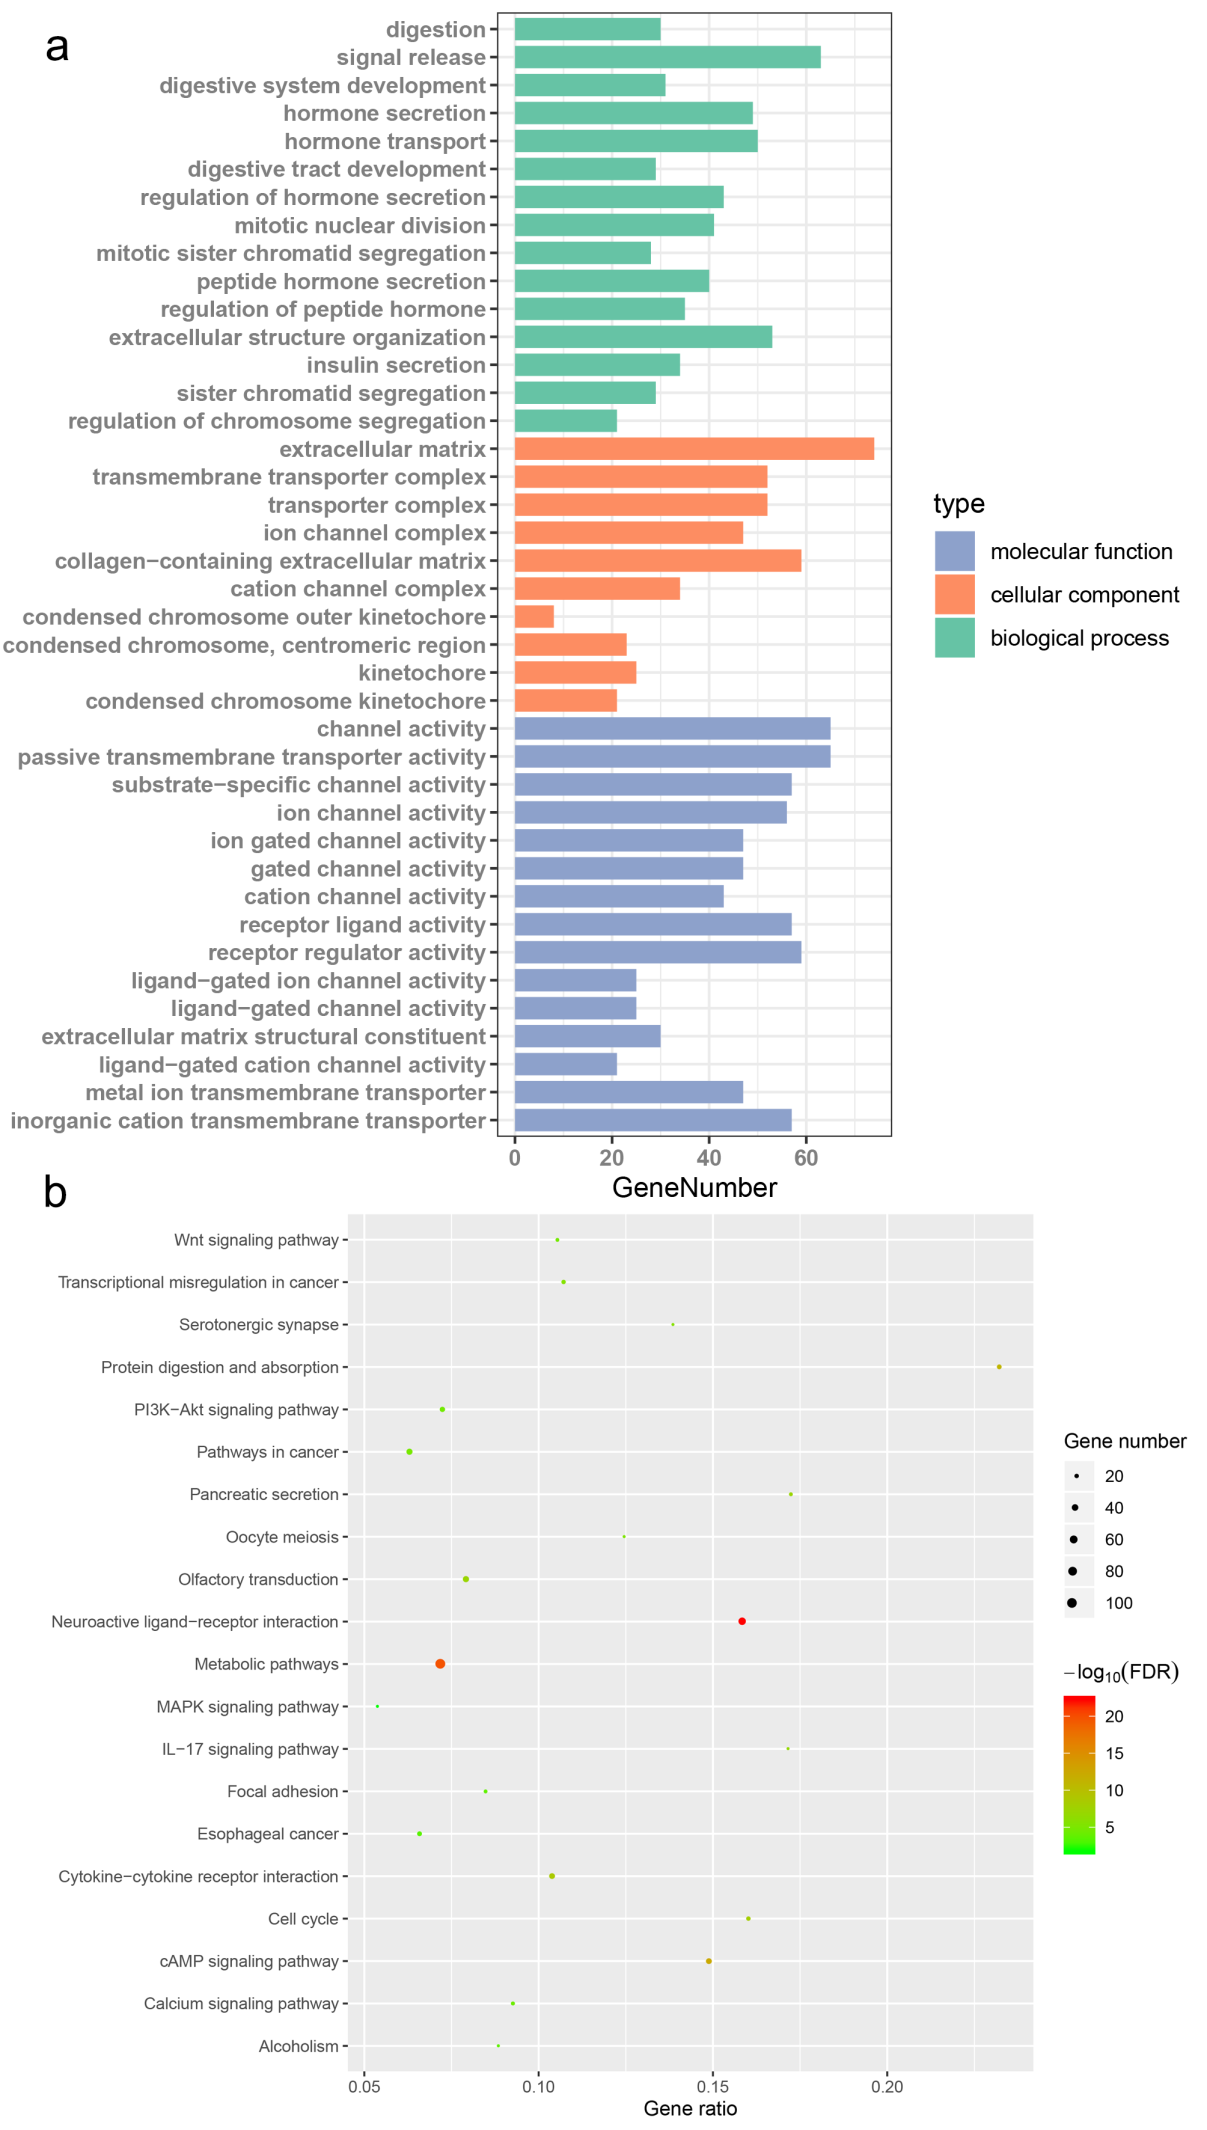
**

**Figure S3.** The display of statistical charts was shown.

**
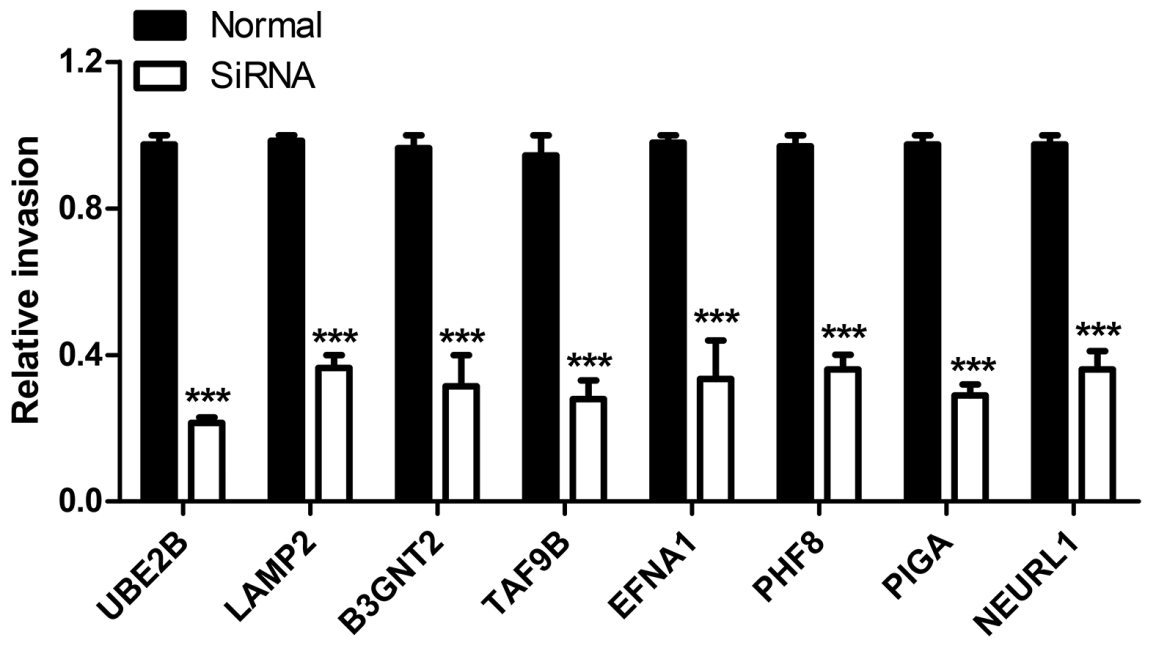
**

| Supplemental table 1 miRNAs in ceRNA network of EC | | | |
| --- | --- | --- | --- |
| miRNA | logFC | P-value | FDR |
| MIR4652 | 3.301823 | 0.000221 | 0.003466 |
| MIR9-3 | 2.782276 | 5.64E-06 | 0.000201 |
| MIR675 | 2.687105 | 3.56E-05 | 0.000783 |
| MIR3153 | 2.334492 | 2.05E-05 | 0.000518 |
| MIR711 | 2.290263 | 4.53E-06 | 0.000174 |
| MIR633a | 2.103744 | 0.000832 | 0.010367 |
| MIR1204 | 2.024341 | 1.90E-11 | 3.92E-09 |
| MIR6757 | -2.31618 | 6.78E-06 | 0.000219 |
| MIR126 | -2.34432 | 3.35E-05 | 0.000752 |
| MIR29C | -2.61231 | 2.41E-11 | 4.15E-09 |
| MIR143 | -2.69067 | 2.15E-07 | 1.07E-05 |
| MIR656 | -3.01084 | 0.000394 | 0.005821 |
| MIR23C | -3.67048 | 0.000428 | 0.006239 |

| Supplemental table 2 lncRNA in ceRNA network of EC | | | |
| --- | --- | --- | --- |
| ID | logFC | P-value | FDR |
| AC079466.1 | 5.355562 | 1.17E-06 | 5.83E-05 |
| RP11-54H7.4 | 4.447396 | 1.72E-09 | 2.80E-07 |
| AC091814.3 | 3.167895 | 4.50E-05 | 0.000998 |
| AC007682.1 | 3.144731 | 0.008414 | 0.046452 |
| DLX6-AS1 | 2.977871 | 2.49E-05 | 0.000639 |
| LINC00486 | 2.916733 | 0.000916 | 0.009306 |
| CCDC144NL-AS1 | 2.866518 | 9.04E-06 | 0.000294 |
| RP5-1186N24.3 | 2.791408 | 0.001422 | 0.013028 |
| LINC02086 | 2.771579 | 4.13E-05 | 0.000943 |
| CTD-2561F5.1 | 2.707583 | 0.006309 | 0.037714 |
| LINC01146 | 2.634661 | 5.45E-05 | 0.001161 |
| CTD-2306M5.1 | 2.605574 | 0.038606 | 0.049122 |
| AC007128.1 | 2.593077 | 3.04E-07 | 1.96E-05 |
| LINC01087 | 2.526895 | 0.004034 | 0.027701 |
| H19 | 2.489716 | 8.15E-05 | 0.001561 |
| CTD-2130O13.1 | 2.458099 | 0.015499 | 0.020559 |
| RP5-1028K7.2 | 2.457507 | 1.22E-06 | 6.06E-05 |
| LINC01727 | 2.435233 | 0.003773 | 0.026523 |
| HOTAIR | 2.429523 | 1.83E-05 | 0.000503 |
| RP11-319E16.1 | 2.404938 | 0.002331 | 0.018865 |
| RP11-314D7.1 | 2.303165 | 0.032886 | 0.041417 |
| RP11-513N24.1 | 2.300972 | 0.032086 | 0.047186 |
| RP11-287F9.2 | 2.241708 | 0.024521 | 0.046914 |
| RP11-415C15.2 | 2.234801 | 0.008162 | 0.04553 |
| AC093627.7 | 2.167061 | 0.025854 | 0.04837 |
| LINC01224 | 2.151326 | 0.001942 | 0.016407 |
| PVT1 | 2.084064 | 5.01E-12 | 1.71E-09 |
| LINC00944 | 2.013653 | 0.000131 | 0.002209 |
| RP13-870H17.3 | -2.0612 | 0.005172 | 0.032953 |
| RP11-932O9.9 | -2.19605 | 1.22E-11 | 3.79E-09 |
| HAND2-AS1 | -2.23192 | 0.004713 | 0.030758 |
| RP11-9G1.3 | -2.36863 | 0.001286 | 0.012065 |
| RP11-307B6.3 | -2.42672 | 2.15E-05 | 0.000562 |
| TMEM220-AS1 | -2.48596 | 4.39E-09 | 6.00E-07 |
| RP11-999E24.3 | -2.53008 | 1.47E-09 | 2.43E-07 |
| NR2F2-AS1 | -2.53959 | 4.87E-09 | 6.48E-07 |
| ADAMTS9-AS1 | -2.58972 | 2.83E-05 | 0.000705 |
| RP11-108M9.3 | -2.63737 | 1.01E-05 | 0.000321 |
| RP11-236L14.2 | -2.80556 | 1.07E-09 | 1.86E-07 |
| RGMB-AS1 | -2.86184 | 8.67E-16 | 8.08E-13 |
| AC000124.1 | -3.03568 | 1.26E-06 | 6.16E-05 |
| LINC00365 | -3.0852 | 3.20E-07 | 2.04E-05 |

| Supplemental table 3 mRNA in ceRNA network of EC | | | |
| --- | --- | --- | --- |
| ID | logFC | P-value | FDR |
| COL11A1 | 6.021541 | 2.71E-15 | 4.59E-13 |
| GPR50 | 5.940147 | 1.97E-07 | 4.68E-06 |
| IL36G | 4.604116 | 7.68E-08 | 2.04E-06 |
| TDRG1 | 4.28692 | 0.000136 | 0.001127 |
| CCL7 | 4.125842 | 1.61E-07 | 3.89E-06 |
| C4orf17 | 3.837278 | 0.001165 | 0.006359 |
| ERVV-1 | 3.79196 | 0.000118 | 0.000998 |
| C11orf87 | 3.695956 | 5.19E-05 | 0.000503 |
| TKTL1 | 3.685966 | 8.81E-05 | 0.00079 |
| HMGA2 | 3.604416 | 2.63E-09 | 1.05E-07 |
| NTS | 3.602865 | 0.000488 | 0.003147 |
| MYH4 | 3.523691 | 0.000388 | 0.002611 |
| H2BFWT | 3.33624 | 0.00054 | 0.003418 |
| AKAP4 | 3.213651 | 0.011678 | 0.040407 |
| SLC6A14 | 3.18408 | 1.71E-06 | 2.94E-05 |
| EREG | 2.995299 | 1.53E-05 | 0.000183 |
| CLEC2L | 2.798292 | 0.000316 | 0.002211 |
| PTHLH | 2.758278 | 0.000291 | 0.002063 |
| SIX1 | 2.735112 | 1.65E-08 | 5.36E-07 |
| EFNA1 | 2.678382 | 0.000305 | 0.002144 |
| HAS3 | 2.552312 | 2.04E-05 | 0.000233 |
| COL1A1 | 2.494988 | 1.43E-07 | 3.53E-06 |
| LAMP2 | 2.49363 | 3.21E-06 | 4.87E-05 |
| DLX4 | 2.493392 | 1.59E-09 | 6.59E-08 |
| GLB1L3 | 2.4921 | 0.000847 | 0.004911 |
| C1QTNF6 | 2.432592 | 1.74E-10 | 9.31E-09 |
| FAM225A | 2.336657 | 2.08E-05 | 0.000236 |
| B3GNT2 | 2.307908 | 0.015413 | 0.03884 |
| SLC30A3 | 2.29045 | 0.000161 | 0.001289 |
| TAF9B | 2.289347 | 0.00923 | 0.007019 |
| FBN2 | 2.266818 | 0.000334 | 0.002301 |
| NEURL1 | 2.250285 | 0.000673 | 0.001692 |
| DUXAP8 | 2.24974 | 1.67E-06 | 2.88E-05 |
| DNMT3B | 2.229379 | 1.48E-11 | 1.02E-09 |
| C5orf47 | 2.224847 | 0.003751 | 0.016312 |
| PIGA | 2.222361 | 0.023875 | 0.030189 |
| KIF18B | 2.221108 | 6.54E-18 | 2.00E-15 |
| MYBL2 | 2.215413 | 1.19E-13 | 1.39E-11 |
| PHF8 | 2.123398 | 0.00614 | 0.002637 |
| COL22A1 | 2.083135 | 0.000446 | 0.002931 |
| SH2D4B | 2.011894 | 3.62E-05 | 0.000375 |
| UBE2B | 2.009236 | 0.007753 | 0.012362 |
| TEX41 | 2.009457 | 0.003521 | 0.015554 |
| RMST | -2.01232 | 0.011713 | 0.0405 |
| PRKACB | -2.03269 | 7.82E-12 | 5.62E-10 |
| SAMD13 | -2.04574 | 1.19E-05 | 0.000149 |
| CLEC3A | -2.06794 | 0.026251 | 0.075575 |
| MYLK | -2.08927 | 2.28E-05 | 0.000255 |
| GPR150 | -2.10546 | 6.15E-07 | 1.24E-05 |
| ADAMTSL1 | -2.10901 | 0.000148 | 0.001206 |
| KCNMB2 | -2.199 | 2.87E-05 | 0.00031 |
| TNS1 | -2.20708 | 1.02E-06 | 1.92E-05 |
| GPIHBP1 | -2.23384 | 3.32E-06 | 5.16E-05 |
| MYOCD | -2.26848 | 0.00015 | 0.001218 |
| KCNMB1 | -2.32304 | 4.38E-06 | 6.54E-05 |
| HOMER2 | -2.33548 | 2.37E-07 | 5.47E-06 |
| C3orf18 | -2.35723 | 5.16E-15 | 8.23E-13 |
| GNG7 | -2.37514 | 4.18E-08 | 1.19E-06 |
| FSHR | -2.39025 | 0.010576 | 0.037359 |
| ANK2 | -2.41493 | 6.53E-06 | 9.10E-05 |
| PRDM16 | -2.45624 | 2.18E-05 | 0.000246 |
| GFRA2 | -2.48245 | 1.02E-08 | 3.54E-07 |
| P2RX2 | -2.48967 | 0.000105 | 0.000913 |
| SSTR1  FAM189A2 | -2.49103  -2.50167 | 0.003599  3.58E-06 | 0.015793  5.48E-05 |
| MAPT | -2.55184 | 1.23E-06 | 2.24E-05 |
| MAPK4 | -2.57687 | 0.000209 | 0.001588 |
| WIPF3 | -2.58009 | 1.44E-09 | 6.02E-08 |
| RD3 | -2.58461 | 3.70E-07 | 8.06E-06 |
| SBSPON | -2.59235 | 9.67E-09 | 3.39E-07 |
| ATCAY | -2.62603 | 1.66E-07 | 3.99E-06 |
| SULT1B1 | -2.64304 | 0.000621 | 0.003827 |
| C1orf158 | -2.71403 | 0.000182 | 0.00143 |
| MUSK | -2.87795 | 7.49E-10 | 3.34E-08 |
| LYVE1 | -2.96575 | 1.20E-08 | 4.07E-07 |
| PLIN4 | -3.04384 | 2.02E-07 | 4.79E-06 |
| RBPMS2 | -3.07757 | 5.04E-10 | 2.32E-08 |
| TUSC5 | -3.10885 | 1.11E-06 | 2.06E-05 |
| ST8SIA3 | -3.23781 | 1.86E-05 | 0.000215 |
| DPP6 | -3.2703 | 1.39E-06 | 2.46E-05 |
| GREM2 | -3.48012 | 3.43E-08 | 1.01E-06 |
| PDK4 | -3.50748 | 2.19E-08 | 6.87E-07 |
| HSPB6 | -3.66658 | 1.06E-09 | 4.57E-08 |
| GPER1 | -4.07705 | 8.65E-21 | 6.38E-18 |
| ADCYAP1R1 | -4.31389 | 4.55E-13 | 4.52E-11 |
| PIRT | -4.35232 | 8.85E-13 | 8.02E-11 |
| PHOX2B | -4.36563 | 9.43E-06 | 0.000122 |
| FRMD1 | -4.81579 | 1.47E-08 | 4.84E-07 |
| PCAT18 | -4.99628 | 4.63E-08 | 1.31E-06 |
| PDIA2 | -5.22547 | 2.84E-11 | 1.77E-09 |
| C14orf180 | -5.4341 | 1.13E-10 | 6.36E-09 |
| B3GAT1 | -5.8399 | 7.45E-19 | 3.19E-16 |
| ESRRG | -6.07154 | 6.26E-19 | 2.79E-16 |
| GKN2 | -7.76189 | 1.07E-09 | 4.59E-08 |
